# Supplementary material for: Unravelling agronomic performance and genetic diversity of newly developed maize inbred lines for arid conditions
Source: PeerJ. 2025 Jun 27;13:e19598. doi: 10.7717/peerj.19598 (PMC12208108; doi:10.7717/peerj.19598)
Supplement: Supplemental Information 5 [file peerj-13-19598-s005.xlsx]

## Sheet: Sheet1
					LA442B	LCA332	LMP214A	LZAm7B	ZBm40A	SNY23	RA28C	B17AB	DKC14	DKCA2	IKA22	SSK36	LZP210	LCM54
				Polymorphic	1	1	1	1	1	1	1	1	1	1	1	0	1	0
				Polymorphic	0	0	0	0	0	0	0	0	0	0	0	0	1	0
				Polymorphic	1	1	1	1	1	1	0	0	0	0	0	0	0	1
				Polymorphic	1	1	1	0	1	1	1	1	1	1	1	1	1	1
				Polymorphic	0	1	1	0	1	0	0	1	1	1	0	0	0	0
				Polymorphic	0	0	0	0	1	0	0	0	0	1	0	1	0	0
				Polymorphic	0	1	0	0	0	1	0	0	0	1	0	1	0	1
				Monomorphic	1	1	1	1	1	1	1	1	1	1	1	1	1	1
				Polymorphic	1	1	0	1	1	1	0	1	0	0	1	1	1	1
				Polymorphic	0	0	0	0	0	0	0	0	1	1	0	0	0	0
				Polymorphic	0	0	0	0	0	0	0	0	1	1	1	0	0	0
				Polymorphic	0	1	0	0	0	1	1	0	0	1	0	0	0	0
				Polymorphic	1	0	0	0	1	1	0	0	1	1	0	0	1	1
				Polymorphic	1	1	0	1	1	1	0	1	0	0	1	1	1	1
				Polymorphic	1	1	0	1	1	1	0	1	0	0	1	1	1	1
				Polymorphic	0	1	0	0	1	1	0	0	1	0	1	1	0	0
				Polymorphic	0	0	0	0	0	0	0	0	0	1	0	0	0	0
				Polymorphic	0	0	0	0	1	1	0	1	1	1	1	1	1	1
				Polymorphic	1	1	1	1	1	0	1	1	0	0	1	1	1	1
				Polymorphic	1	1	1	1	1	0	1	1	0	1	1	1	1	1
				Polymorphic	0	0	0	0	0	0	0	0	0	1	0	0	0	0
				Polymorphic	0	0	0	0	0	0	0	0	0	0	1	0	0	0
				Polymorphic	0	1	1	0	0	1	0	0	0	0	0	0	1	0
				Polymorphic	0	1	1	1	0	0	0	0	0	0	0	0	1	0
				Polymorphic	1	0	0	0	0	0	0	0	0	0	0	0	0	0
				Polymorphic	0	1	0	0	0	1	0	0	0	0	0	0	1	0
				Polymorphic	1	0	0	1	1	0	0	1	0	0	0	0	1	1
				Polymorphic	1	0	0	1	1	1	0	0	1	0	0	0	0	0
				Polymorphic	1	1	1	1	1	1	0	0	1	0	0	1	1	1
				Polymorphic	1	1	1	1	1	0	0	0	0	0	0	0	0	0
				Polymorphic	0	1	1	0	0	0	0	1	0	0	1	1	1	0
				Polymorphic	0	0	0	0	1	0	0	0	0	1	0	1	0	0
				Polymorphic	1	1	1	1	1	1	1	1	1	0	1	1	1	1
				Polymorphic	0	0	0	0	1	0	0	0	1	0	0	1	0	0
				Polymorphic	0	0	0	1	1	1	1	0	1	0	0	1	1	1
				Polymorphic	1	0	0	0	0	0	0	0	0	0	0	0	0	0
				Polymorphic	0	0	1	0	0	0	0	0	0	0	0	0	0	0
				Monomorphic	1	1	1	1	1	1	1	1	1	1	1	1	1	1
				Polymorphic	0	0	1	0	0	0	0	0	0	0	1	0	0	0
				Polymorphic	1	0	0	0	0	1	0	0	0	1	0	0	0	0
				Polymorphic	0	0	0	1	0	0	0	0	0	0	0	0	0	0
				Polymorphic	0	0	0	0	1	0	0	0	0	0	0	0	0	0
				Monomorphic	1	1	1	1	1	1	1	1	1	1	1	1	1	1
				Polymorphic	0	0	1	0	0	0	0	0	0	0	0	0	0	0
				Polymorphic	1	1	0	0	1	0	1	0	0	0	0	0	0	0
				Polymorphic	0	1	0	0	0	0	1	0	0	0	0	0	0	0
				Polymorphic	0	0	0	0	0	1	0	0	0	1	0	0	0	0
				Monomorphic	1	1	1	1	1	1	1	1	1	1	1	1	1	1
				Polymorphic	1	1	1	1	1	1	1	1	1	1	0	1	1	0
				Polymorphic	1	1	1	1	1	1	1	1	1	0	1	1	0	1
				Polymorphic	1	1	1	1	1	1	1	1	1	0	0	1	0	0
				Polymorphic	1	1	0	1	1	1	1	0	0	0	1	0	0	1
				Polymorphic	0	0	1	1	0	0	0	1	0	0	0	0	0	0
				Polymorphic	1	1	1	1	1	1	1	0	1	0	0	1	0	0
				Polymorphic	0	0	0	0	0	0	0	0	0	0	1	0	0	1
				Monomorphic	1	1	1	1	1	1	1	1	1	1	1	1	1	1
				Monomorphic	1	1	1	1	1	1	1	1	1	1	1	1	1	1
				Polymorphic	0	0	1	1	0	1	1	1	1	0	0	1	0	0
				Polymorphic	0	0	0	0	0	0	0	0	0	1	1	0	1	1
				Polymorphic	0	0	0	0	1	0	0	0	0	1	0	0	1	0
				Monomorphic	1	1	1	1	1	1	1	1	1	1	1	1	1	1
				Polymorphic	1	0	0	0	0	0	0	0	1	1	1	1	0	0
				Polymorphic	1	0	0	0	0	0	1	1	1	1	1	1	1	1
				Polymorphic	0	1	1	1	1	0	1	1	0	0	1	1	0	0
				Monomorphic	1	1	1	1	1	1	1	1	1	1	1	1	1	1
				Polymorphic	0	0	0	0	0	0	0	0	0	0	1	1	0	0
				Polymorphic	1	0	1	1	1	0	1	1	1	1	1	1	1	1
				Polymorphic	0	1	1	1	1	0	1	1	1	1	0	0	0	0
				Polymorphic	0	1	1	1	1	1	1	1	1	1	0	0	1	1
				Polymorphic	1	0	0	0	0	0	0	0	0	0	0	0	0	0
				Polymorphic	1	0	0	0	0	0	0	0	0	1	0	0	0	0
				Polymorphic	1	0	1	1	1	0	1	1	1	1	1	0	0	1
				Polymorphic	1	1	0	1	1	1	1	1	1	1	1	1	1	1
				Polymorphic	1	1	1	1	1	0	1	0	0	0	1	1	1	0
				Polymorphic	1	0	0	0	0	0	0	0	0	0	0	0	0	0
				Polymorphic	0	0	0	1	0	0	0	0	0	0	0	0	0	0
				Monomorphic	1	1	1	1	1	1	1	1	1	1	1	1	1	1
				Monomorphic	1	1	1	1	1	1	1	1	1	1	1	1	1	1
				Monomorphic	1	1	1	1	1	1	1	1	1	1	1	1	1	1
				Monomorphic	1	1	1	1	1	1	1	1	1	1	1	1	1	1
				Polymorphic	0	0	1	1	1	1	1	1	1	1	1	1	1	1
				Monomorphic	1	1	1	1	1	1	1	1	1	1	1	1	1	1
				Monomorphic	1	1	1	1	1	1	1	1	1	1	1	1	1	1
				Polymorphic	1	1	1	1	1	1	0	1	1	1	0	0	1	1
				Polymorphic	0	0	0	0	0	0	0	0	0	0	0	0	0	1
				Polymorphic	1	1	1	1	1	1	0	0	0	0	0	1	1	1
				Polymorphic	0	0	0	0	0	0	0	1	0	0	0	0	0	0
				Monomorphic	1	1	1	1	1	1	1	1	1	1	1	1	1	1
				Monomorphic	1	1	1	1	1	1	1	1	1	1	1	1	1	1
				Monomorphic	1	1	1	1	1	1	1	1	1	1	1	1	1	1
				Monomorphic	1	1	1	1	1	1	1	1	1	1	1	1	1	1
				Monomorphic	1	1	1	1	1	1	1	1	1	1	1	1	1	1
				Monomorphic	1	1	1	1	1	1	1	1	1	1	1	1	1	1
				Monomorphic	1	1	1	1	1	1	1	1	1	1	1	1	1	1
				Polymorphic	1	1	0	1	1	0	0	0	0	1	0	0	0	0
