# Supplementary material for: Unravelling agronomic performance and genetic diversity of newly developed maize inbred lines for arid conditions
Source: PeerJ. 2025 Jun 27;13:e19598. doi: 10.7717/peerj.19598 (PMC12208108; doi:10.7717/peerj.19598)
Supplement: Supplemental Information 6 [file peerj-13-19598-s006.xlsx]

## Sheet: Data
Season	Genotype	Rep	Days to tasseling	Days to silking	Plant height	Ear height	Grain yield	Ear length	Ear diameter	No. rows/ear	No. kernels/ear
First	SK5	1	71	73	200	80	2.16	12.66	3.56	12	20
First	SK8	1	72	74	205	100	1.93	17	3.8	12.4	36
First	SK9	1	71	73	205	115	2.62	18	4.4	12.4	32
First	SK12	1	68	71	180	90	2.09	17.6	3.44	13.2	29.6
First	SK13	1	72	74	190	115	2.58	19.2	4.44	14	34
First	SD7	1	74	76	245	110	1.91	17	3.2	12	34
First	SD34	1	72	74	235	110	3.1	18.4	3.9	14	39
First	SD63	1	69	72	170	90	1.55	14.7	3.5	12.4	23
First	Gz602	1	74	76	195	85	1.45	15.4	3.8	12	25
First	Gz628	1	64	66	180	80	2.8	16.4	3.2	12	26
First	Gm2	1	47	49	190	100	1.05	13.7	3.5	12	29
First	Gm4	1	74	76	170	75	1.05	13	3.4	12.4	28
First	Gm18	1	74	77	165	90	1.623	17.3	3.4	12.8	32
First	Gz603	1	73	75	225	115	2.28	19	3.44	12	29
First	SK5	2	71	73	185	80	1.71	12.6	3.4	12.4	27
First	SK8	2	72	75	195	95	2.06	17.4	3.75	12	26.5
First	SK9	2	71	74	180	80	1.97	11.6	3.65	12	31
First	SK12	2	65	70	210	105	1.8	15.4	3.3	13.3	30
First	SK13	2	71	74	180	85	2.17	16	3.8	12.8	30
First	SD7	2	74	77	265	135	2.38	17.6	3.6	12	36.5
First	SD34	2	72	74	220	105	2.44	14.3	3.8	12	35
First	SD63	2	68	71	190	100	1.86	12.8	3.3	12	26
First	Gz602	2	74	76	200	100	1.64	15.8	3.6	12.4	27
First	Gz628	2	65	68	200	100	3.05	15	3.95	13.2	36
First	Gm2	2	47	49	165	85	1.18	12.7	3.2	12	28
First	Gm4	2	73	75	190	90	1.33	15.2	3.3	12.4	28
First	Gm18	2	74	76	190	95	2.488	18	4.04	12.8	30
First	Gz603	2	73	75	240	120	2.18	14.8	3	12	29
First	SK5	3	71	74	170	65	1.64	12	3.5	12	26
First	SK8	3	72	75	200	85	2.5	17.75	4.1	12	30
First	SK9	3	71	73	200	95	1.68	16.5	3	12.4	28
First	SK12	3	69	72	180	90	2.6	17.4	3.8	13.6	28
First	SK13	3	73	75	165	70	2.24	15.3	3.1	12	27
First	SD7	3	72	75	230	115	1.83	16.3	3	12	35.5
First	SD34	3	74	75	205	95	2.35	18.3	3.7	14	33.6
First	SD63	3	69	71	165	75	1.05	13.5	3	12	26
First	Gz602	3	74	76	190	75	2.06	17.75	3.7	12	28
First	Gz628	3	65	68	190	105	3.05	15.4	3.92	13.2	31
First	Gm2	3	47	49	155	75	1.3	13.2	2.9	12	26
First	Gm4	3	73	75	187	95	1.55	14.1	3	12.4	27
First	Gm18	3	75	77	165	70	1.736	14.7	3.7	13.2	25
First	Gz603	3	72	74	235	130	1.74	14	3	12.4	26
Second	SK5	1	63	63	180	85	2.5	14.8	3.7	12.4	23
Second	SK8	1	68	69	160	70	1.85	16.5	3.8	12.4	29
Second	SK9	1	68	69	170	65	1.7	15.6	3.4	12.4	30
Second	SK12	1	70	71	190	85	1.73	16.9	3.7	16	29
Second	SK13	1	66	67	195	85	2.26	17.4	4.3	14.8	26
Second	SD7	1	68	68	185	90	1.55	18.1	3.4	12	28
Second	SD34	1	68	70	195	85	2.23	19.1	4	12.8	34
Second	SD63	1	68	68	145	75	1.31	12.3	3.2	12	21
Second	Gz602	1	70	72	180	85	1.864	15.6	3.4	12	27
Second	Gz628	1	70	71	160	65	1.72	13.8	3.6	12	22
Second	Gm2	1	50	52	160	65	2.144	14.3	4	14	27
Second	Gm4	1	69	71	155	60	2.35	13.1	3.3	12	31
Second	Gm18	1	70	72	205	80	1.52	15.2	3.2	12	26
Second	Gz603	1	68	71	190	85	1.55	17.5	3.5	14	27
Second	SK5	2	65	67	197	95	2.33	12.5	3.9	12	23
Second	SK8	2	68	70	186	95	2.11	15.3	3.9	12	25
Second	SK9	2	68	69	185	85	1.79	16.5	3.6	12	24
Second	SK12	2	69	72	175	70	2.13	16.3	3.2	14.4	30
Second	SK13	2	68	69	180	95	1.859	15.3	3.3	12.4	26
Second	SD7	2	70	73	160	70	1.16	16	2.8	12	26
Second	SD34	2	68	70	195	85	1.861	15.6	3.3	12	33
Second	SD63	2	70	73	140	65	1.69	12.5	3.1	12	30
Second	Gz602	2	70	72	200	100	2.12	15.5	2.9	12	32
Second	Gz628	2	69	71	175	80	1.94	16	3.5	15.2	25
Second	Gm2	2	49	52	165	65	1.629	12	3.8	12.8	22
Second	Gm4	2	68	70	175	70	1.851	15.2	3.1	12	31
Second	Gm18	2	69	71	200	75	1.82	14.7	3.1	12	24
Second	Gz603	2	69	70	200	100	1.66	17.1	3.1	12.4	24
Second	SK5	3	65	67	175	65	1.727	13.5	3.3	13.6	22
Second	SK8	3	69	72	175	75	1.627	15.1	3.65	12	28
Second	SK9	3	67	69	190	85	1.69	15.5	3.6	12	29
Second	SK12	3	69	71	175	80	1.94	16.8	3.5	14.8	31
Second	SK13	3	68	70	200	105	1.741	12.3	3.5	12.4	22
Second	SD7	3	70	72	150	70	1.56	16	3	12	30
Second	SD34	3	67	70	165	75	2.41	18.7	4.1	14	35
Second	SD63	3	70	72	165	90	1.46	12.5	3.3	12	27
Second	Gz602	3	69	70	190	70	1.749	16.3	3.4	12	28
Second	Gz628	3	69	72	190	90	1.64	14.2	3.5	12	26
Second	Gm2	3	47	49	175	65	1.741	11	3.6	14	24
Second	Gm4	3	68	70	180	95	1.736	14.2	3	10.6	27
Second	Gm18	3	69	72	195	75	1.22	14.5	3.2	12	26
Second	Gz603	3	69	70	190	80	1.57	18.5	3.2	12	32
Third	SK5	1	61	63	160	55	1.55	13.5	3.1	12	22
Third	SK8	1	64	66	180	75	1.8	15.4	3.4	12.4	24
Third	SK9	1	62	64	160	60	2.73	13	3.5	12	23
Third	SK12	1	65	67	150	55	2.3	13.2	3.2	12.8	22
Third	SK13	1	61	64	160	75	3.05	16	3.7	15.6	34
Third	SD7	1	67	69	205	90	2.8	15.3	3.6	13.2	32
Third	SD34	1	62	65	235	95	2.8	18.2	3.3	12	36
Third	SD63	1	67	69	150	60	3.41	17	4.1	14.4	35
Third	Gz602	1	66	68	195	75	2.85	13	3.4	12	28
Third	Gz628	1	62	64	160	60	2.15	15.5	3.5	13.2	29
Third	Gm2	1	45	47	135	55	2.9	13.5	3.8	12.4	27
Third	Gm4	1	65	67	160	55	2.85	17	3.7	14.8	23
Third	Gm18	1	66	69	165	90	2.46	13.2	3.2	12	22
Third	Gz603	1	67	68	175	80	1.8	14	3.2	12.8	22
Third	SK5	2	60	62	190	80	2.35	14.8	3.1	12	23
Third	SK8	2	64	67	190	70	1.8	12.2	3	12	21
Third	SK9	2	62	65	180	75	2.4	13	3.2	14	23
Third	SK12	2	65	68	165	60	2.3	12.8	3.1	12.4	27
Third	SK13	2	61	63	165	70	2.8	16.6	3.6	12	25
Third	SD7	2	67	68	200	80	2.35	13.1	3.5	12	24
Third	SD34	2	63	65	220	90	3.455	12.6	3.7	12	29
Third	SD63	2	65	67	160	65	3.4	16.6	3.4	15.6	32
Third	Gz602	2	64	66	225	95	3.3	12	4	14	23
Third	Gz628	2	62	65	180	80	2.8	17.8	3.6	12.4	34
Third	Gm2	2	47	50	165	65	3.3	14.2	3.7	12	25
Third	Gm4	2	68	68	165	65	3.15	15.3	3.7	14	26
Third	Gm18	2	65	67	145	65	2.73	16.5	4	13.6	33
Third	Gz603	2	67	69	165	60	2.05	12.8	3.2	12	23
Third	SK5	3	60	63	175	70	3.3	16	3.6	12	27
Third	SK8	3	64	66	195	75	2.3	15.5	4	13.6	28
Third	SK9	3	63	65	165	55	1.95	13.4	3.2	12	24
Third	SK12	3	64	66	150	60	2.83	16.2	3.5	14	30
Third	SK13	3	63	65	195	90	3.3	15.5	3.9	12.4	33
Third	SD7	3	67	68	220	95	2.05	16.7	3.2	12	23
Third	SD34	3	63	65	210	80	3.63	16.8	4.1	16	35
Third	SD63	3	66	68	135	50	2.85	15	3.3	13.2	27
Third	Gz602	3	64	66	215	90	2.53	16	3	12	25
Third	Gz628	3	64	66	185	70	2.8	13.5	3.5	12	23
Third	Gm2	3	48	51	140	55	2.55	13.7	3.7	12	30
Third	Gm4	3	65	67	145	50	2.55	14	3.1	12	22
Third	Gm18	3	65	67	120	60	2.55	15.5	3.5	12.4	24
Third	Gz603	3	67	69	195	80	1.8	12.5	3.1	13.2	25
